# Supplementary material for: Multifunctional Magnetic Resonance Imaging for the assessment of renal pathological alterations in IgA Nephropathy
Source: Research Square preprint supplement (doi:10.21203/rs.3.rs-8240997/v1), 2025-12-11
Supplement: Supplementary file 1 [file b385f0aa2558ed357fda4a4d.xlsx]

## Sheet: Data
sex(1=female,2= male)	age (years)	SBP (mmHg)	DBP (mmHg)	Hypertention (0=No,1=Yes)	Smoke (0=No, 1= Yes)	Diabetes(0=No, 1= Yes)	Cardiovascular or cerebrovascular diseases(0=No, 1=Yes)	Dyslipidemia(0=No, 1=Yes)	Creatinine(umol/L)	estimated glomerular filtration rate (ml/min/1.73m2)	Glomerulosclerosis index	Tubulointerstitial injury	24-h urinary protein (g)	The mean medullary MK from DKI	The mean medullary Ka from DKI	The mean medullary Kr from DKI	The mean medullary FA from DTI	The mean medullary MD from DTI (mm2/s)	The mean medullary Da from DTI (mm2/s)	The mean medullary Dr from DTI (mm2/s)	The mean medullary ADC from IVIM (mm2/s)	The mean medullary D from IVIM (mm2/s)	The mean cortical MK from DKI	The mean cortical Ka from DKI	The mean cortical Kr from DKI	The mean cortical FA from DTI	The mean cortical MD from DTI (mm2/s)	The mean cortical Da from DTI (mm2/s)	The mean cortical Dr from DTI (mm2/s)	The mean cortical ADC from IVIM (mm2/s)	The mean cortical D from IVIM (mm2/s)
1	28	116	60	0	0	0	0	0	60	119.495	0.07	0	0.48	0.5165	0.679	0.44	0.2845	1.74167	2.31333	1.45	0.00194	0.00167	0.582	0.62	0.531	0.144	2.06	2.37	1.905	0.00217	0.00189
1	26	114	84	0	0	0	0	0	62	119.681	0.22	0.2	0.42	0.581	0.65	0.52	0.273	1.855	2.43333	1.57	0.00183	0.0016	0.547	0.629	0.525	0.1177	2.11	2.355	1.985	0.00211	0.001755
1	34	130	79	0	0	0	0	0	86	76.175	0.22	1	3.22	0.623667	0.675333	0.56	0.166	1.93833	2.29167	1.76	0.00204	0.0018	0.5915	0.568	0.482	0.1262	2.1	2.39	1.955	0.002045	0.00189
1	68	140	70	1	0	1	1	1	65	84.1557	0.23	0.2	0.8	0.546667	0.6315	0.52	0.240333	1.78	2.265	1.53	0.00189	0.00161	0.613	0.697	0.526	0.145	1.81	2.065	1.685	0.001935	0.0016
2	37	122	88	0	0	0	0	0	66	117.407	0.26	0.42	1.7	0.570833	0.669	0.5	0.182	1.91167	2.34833	1.69	0.00186	0.00147	0.54	0.597	0.5015	0.18	2.125	2.475	1.945	0.002275	0.00179
2	52	139	81	1	0	0	1	0	74	100.812	0.29	0.36	1.43	0.598	0.67825	0.53	0.187667	1.87	2.26667	1.67	0.00201	0.00157	0.624	0.68	0.5875	0.10595	2.11	2.36	1.985	0.002255	0.00155
1	42	113	71	1	0	1	0	1	73	87.7926	0.29	0.64	1.34	0.647333	0.783167	0.51	0.1715	1.67167	1.74833	1.33	0.00177	0.00152	0.5495	0.669	0.4995	0.2395	1.755	2.15	1.555	0.00201	0.00169
2	72	151	97	1	1	0	0	0	85	78.4942	0.96	0.91	5.06	0.5315	0.632333	0.43	0.187667	1.78833	2.17333	1.6	0.002	0.00153	0.542	0.641	0.4745	0.09435	1.9	2.085	1.805	0.00207	0.00167
2	61	146	92	1	1	0	0	0	69	97.3962	1.13	0.87	1.15	0.534833	0.5985	0.48	0.231983	2.00833	2.54167	1.74	0.00191	0.00174	0.5825	0.648	0.516	0.1395	2.21	2.53	2.05	0.001825	0.00156
2	59	142	86	1	0	1	0	1	120	56.6806	1.47	0.44	5.5	0.488	0.624167	0.4065	0.125	1.98	2.23833	1.865	0.002025	0.00170667	0.518	0.597	0.4515	0.138	2.24	2.55	2.08	0.002015	0.0018
2	45	134	99	1	1	0	0	0	80	102.103	1.57	1	0.34	0.597333	0.596	0.585667	0.18865	1.93333	2.33833	1.73	0.00176	0.00156333	0.5995	0.6715	0.521	0.09765	2.1	2.32	1.99	0.001935	0.00175
2	41	140	99	1	0	0	0	1	105	75.5893	1.58	0.75	0.7	0.703167	0.750333	0.661	0.149333	1.86	2.17333	1.70333	0.00177667	0.00138667	0.6965	0.704	0.6605	0.1265	2.05	2.2	1.825	0.00188	0.00146
2	32	145	75	1	0	0	0	0	90	97.0188	0.72	1.33	2.09	0.702833	0.6855	0.68	0.275	1.78333	2.33333	1.5	0.00189	0.00151	0.6915	0.632	0.528	0.168	2.025	2.365	1.855	0.00207	0.001675
1	46	136	108	1	0	0	0	0	76	81.3034	1	1.16	1.14	0.5695	0.685167	0.47	0.228	1.895	2.38833	1.65	0.00223	0.0018	0.5935	0.681	0.5275	0.1289	2.1	2.375	1.965	0.002205	0.001815
1	41	150	86	0	0	1	0	0	66	99.8705	1	1.23	4.74	0.474667	0.5805	0.42	0.186667	1.79833	2.17333	1.61	0.00185	0.00165	0.5525	0.704	0.453	0.06975	2.01	2.155	1.935	0.00201	0.00171
1	44	140	72	0	1	0	0	0	87	70.0221	1.08	1.58	0.94	0.6925	0.735167	0.67	0.10765	1.91	2.13333	1.8	0.00207	0.00158	0.6385	0.616	0.6225	0.1033	2.17	2.4	2.055	0.002285	0.00183
2	26	160	110	1	1	0	0	0	120	71.4676	1.21	1.52	4.95	0.5385	0.687167	0.45	0.111933	1.64667	1.845	1.55	0.00198	0.00143	0.603	0.66	0.5645	0.145	1.73	2	1.595	0.002045	0.00144
2	34	144	93	1	0	0	0	0	87	99.6678	1.45	1.5	2.34	0.726	0.698667	0.55	0.261333	1.785	2.33	1.51	0.0018	0.00167	0.688	0.737	0.6455	0.0965	2.045	2.255	1.94	0.0021	0.00186
2	29	138	98	1	0	0	0	0	97	90.5066	1.62	1.72	1.12	0.598333	0.6965	0.57	0.171	1.84	2.17833	1.67	0.00191	0.00154	0.604	0.682	0.5605	0.145	2.025	2.34	1.865	0.002005	0.00154
1	56	120	80	1	0	1	1	1	84	67.1508	1.72	1.28	0.38	0.685167	0.7365	0.66	0.119833	1.78667	2.015	1.67	0.00184	0.00147	0.6105	0.715	0.543	0.0745	1.96	2.105	1.89	0.00198	0.001625
1	23	122	82	0	0	0	0	0	46	135.073	1.92	1.75	1.31	0.586833	0.795167	0.36	0.1725	1.81	2.14167	1.64	0.00186	0.00149	0.6305	0.696	0.5625	0.1125	2.1	2.33	1.985	0.00252	0.00187
1	39	122	68	0	0	0	0	0	104	58.4486	2.3	1.86	1.2	0.650333	0.723833	0.630333	0.134517	1.82333	2.09	1.68833	0.00177333	0.001635	0.646	0.6735	0.5965	0.0995	2.135	2.375	2.015	0.001805	0.00166
1	61	140	76	1	0	0	0	0	94	56.59	2.43	1.88	0.4	0.857833	0.7535	0.6	0.0884167	1.84333	2.01167	1.76	0.00193333	0.00160333	0.634	0.6335	0.5745	0.1705	2.045	2.365	1.88	0.002205	0.001605
2	58	141	78	1	0	0	0	0	304	18.5533	2.53	1.74	3.56	0.609	0.714	0.4	0.177867	1.775	2.10333	1.61	0.00206	0.00135	0.548	0.691	0.4135	0.1525	1.83	2.125	1.68	0.002135	0.001395
2	42	150	90	1	1	1	0	1	139	53.4715	2.57	1.6	3.8	0.644833	0.834667	0.4425	0.10225	1.67	1.84167	1.58	0.00169167	0.00144	0.6645	0.855	0.502	0.08895	1.75	1.91	1.67	0.00173	0.001465
1	43	145	95	1	0	0	0	1	116	49.8006	2.87	2.3	3.4	0.649833	0.734667	0.6235	0.137167	1.795	2.05333	1.66833	0.00174167	0.00156	0.6145	0.69	0.5365	0.116	2.015	2.255	1.895	0.0017	0.001605
2	64	128	77	1	0	0	0	0	125	52.0891	2.95	1.7	3	0.634667	0.701667	0.575	0.11845	1.75983	2.04167	1.69167	0.0018	0.001535	0.661	0.727	0.628	0.08335	1.99	2.17	1.9	0.00202	0.001565
2	42	120	80	1	0	0	0	0	347	17.6917	3.4	3	5.8	0.563833	0.812667	0.3565	0.118333	1.64667	1.82	1.56333	0.00155167	0.00143333	0.593	0.7205	0.4625	0.1655	1.765	2.07	1.615	0.00178	0.00148
2	40	137	101	0	1	0	0	0	882	5.80841	3.72	3	5.07	0.685667	0.725833	0.66	0.0835167	1.51167	1.62667	1.46	0.00166	0.00139	0.678	0.678	0.5705	0.11045	1.71	1.93	1.605	0.00159	0.00134
2	68	166	90	1	0	0	0	0	165	36.2051	3.75	3	1.83	0.5705	0.782333	0.4	0.145	1.74833	2.01	1.62	0.00173	0.00156	0.6365	0.774	0.44	0.1335	1.83	2.095	1.695	0.00185	0.00146
2	67	170	120	1	0	0	0	1	227	24.7927	4	3	4.9	0.6575	0.714133	0.52	0.128833	1.655	1.89167	1.54	0.00194	0.00168	0.6425	0.752	0.4955	0.1605	1.78	2.075	1.64	0.00226	0.00177
